# Supplementary material
Source: PubMed Central journal article supplement (PMC2773996)
Supplement: 0908016106_0908016106SI.pdf [file 0908016106_0908016106SI.pdf]

# Supporting Information

Ja et al. 10.1073/pnas.0908016106

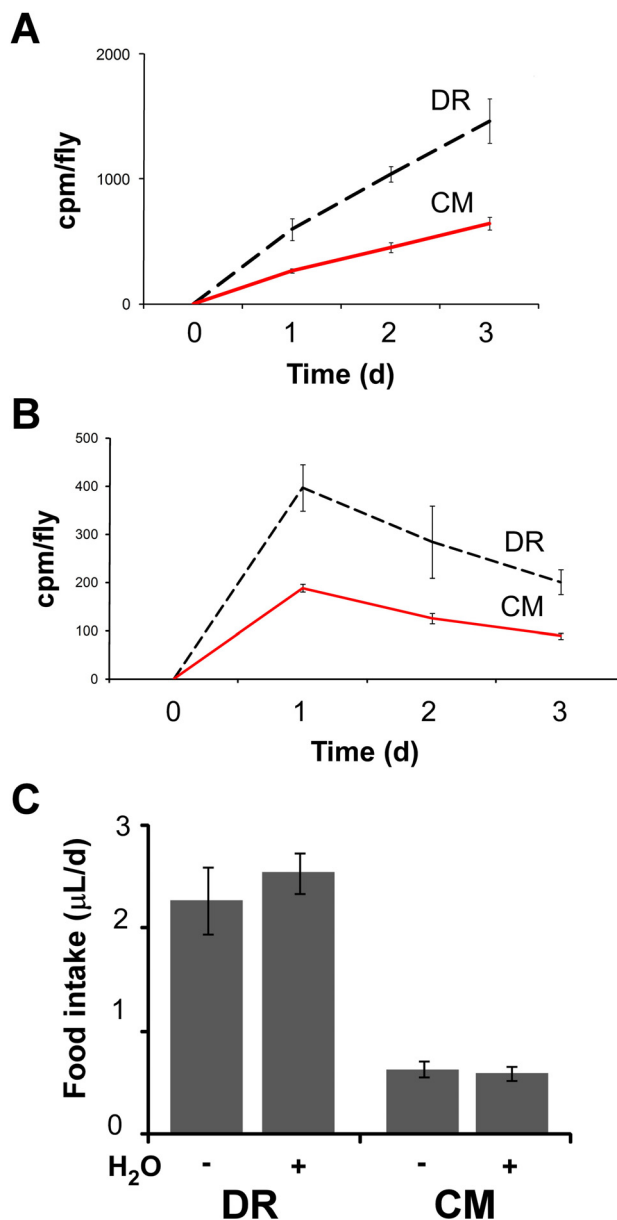

**Fig. S1.** Food dilution elicits compensatory feeding as measured by radiolabeling the medium (1–3) or by using the Capillary Feeder (CAFE) assay (4). (A) Time-course of isotope accumulation for flies fed yeast extract/sucrose (YE/S: CM = 5% YE + 5% S; DR = 1% YE + 1% S) show near-linear accumulation rates of differing slope, with neither curve reaching saturation over the trial period (72 h). (B) Radioactive pulse-chase of flies fed isotope-labeled food for 24 h and then transferred to nonlabeled medium of identical composition. Isotope levels were assayed at three time points: 24 h (immediately before transfer), 48 h, and 72 h. Isotope levels in flies fed diluted food show a faster rate of decline, ruling out that impaired excretion or metabolization of the label underlies the observed differences. Results in A and B are expressed as an average ( $\pm$  SD) of 3–4 trials, each containing 15 Canton-5 males. (C) Food consumption measured in the CAFE (4) using YE/S (CM = 10% YE + 10% S; DR = 2.5% YE + 2.5% S) is consistent with radiolabeling results (Fig. 1B). The presence of an ad libitum water source in the CAFE chamber did not affect feeding ( $P > 0.05$ , Student's  $t$  test). Each time point is expressed as an average ( $\pm$  SD) of four trials, each containing three Canton-5 males.

1. Ayaki T, Oshima K, Yoshikawa I (1985) Linear relationship between lethal mutation yield and intake of ethyl methanesulfonate in *Drosophila melanogaster*. *Environ Mutagen* 7:147–153.
2. Carvalho GB, Kapahi P, Anderson DJ, Benzer S (2006) Allocrine modulation of feeding behavior by the sex peptide of *Drosophila*. *Curr Biol* 16:692–696.
3. Thompson ED, Reeder BA, Bruce RD (1991) Characterization of a method for quantitating food consumption for mutation assays in *Drosophila*. *Environ Mol Mutagen* 18:14–21.
4. Ja WW, et al. (2007) Prandiology of *Drosophila* and the CAFE assay. *Proc Natl Acad Sci USA* 104:8253–8256.



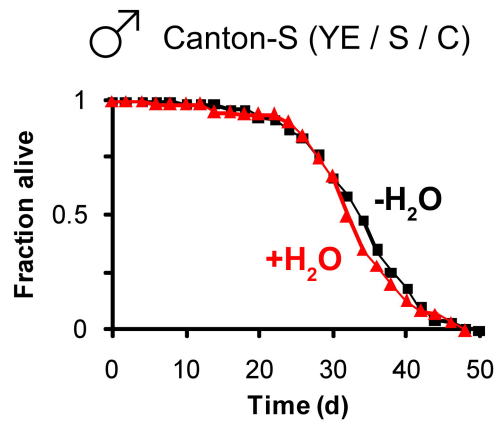

**Fig. S3.** Water supplementation does not affect the lifespan of Canton-S males on high-yeast (CM) YE/S/C medium. Flies were aged in vials. Medium composition is described in Fig. 3.  $n = 87$  flies, -H<sub>2</sub>O; 86 flies, +H<sub>2</sub>O;  $P = 0.40$ , log-rank test.

**Table S1. Statistics of Cox proportional hazards analysis for the effect of diet on survival in the presence or absence of water**

|                  | Effect              | df | $\chi^2$ | <i>p</i> | Hazard ratio* | Lower CI | Upper CI |
|------------------|---------------------|----|----------|----------|---------------|----------|----------|
| YE/S             |                     |    |          |          |               |          |          |
| Canton-S males   | DR                  | 1  | 10.36    | 0.0013   | 1.728         | 1.244    | 2.401    |
|                  | DR+H <sub>2</sub> O | 1  | 0.18     | 0.6694   | 1.059         | 0.815    | 1.376    |
| BY/S             |                     |    |          |          |               |          |          |
| Canton-S females | DR                  | 1  | 16.14    | 0.0001   | 1.693         | 1.304    | 2.199    |
|                  | DR+H <sub>2</sub> O | 1  | 2.55     | 0.1101   | 1.284         | 0.944    | 1.746    |
| Dahomey females  | DR                  | 1  | 5.32     | 0.0211   | 1.450         | 1.059    | 1.986    |
|                  | DR+H <sub>2</sub> O | 1  | 0.61     | 0.4269   | 0.879         | 0.640    | 1.208    |
| YE/S/C           |                     |    |          |          |               |          |          |
| Canton-S males   | DR                  | 1  | 43.65    | <0.0000  | 3.920         | 2.569    | 5.980    |
|                  | DR+H <sub>2</sub> O | 1  | 28.94    | <0.0000  | 2.703         | 1.871    | 3.904    |
| Canton-S females | DR                  | 1  | 23.86    | <0.0000  | 2.478         | 1.706    | 3.600    |
|                  | DR+H <sub>2</sub> O | 1  | 30.65    | <0.0000  | 3.188         | 2.084    | 4.877    |

\*When the hazard ratio is close to 1, DR has little effect on survival.
